# Supplementary material
Source: MDPI journal article supplement (https://www.mdpi.com/2073-4441/15/6/1151)
Supplement: s1 [file s1]

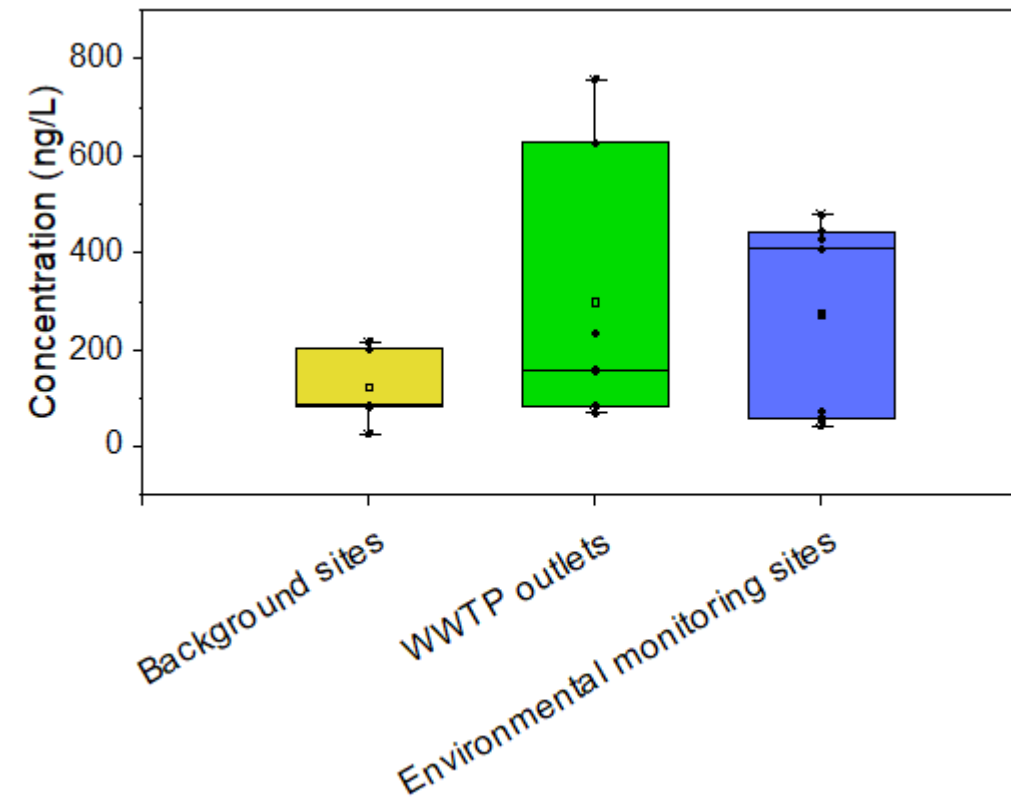

**Fig. S1** Cumulative concentrations of PPCPs in different types of sampling sites

**Table S1**  
PPCPs detected in surface water of the Daqing River Basin

|                | Classification        | Name              | CAS        |
|----------------|-----------------------|-------------------|------------|
| Antibiotic     | Sulfonamide           | Sulfadiazine      | 68-35-9    |
|                |                       | Sulfamethazine    | 57-68-1    |
|                |                       | Sulfamethoxazole  | 723-46-6   |
|                |                       | Sulfathiazole     | 72-14-0    |
|                | Fluoroquinolone       | Norfloxacin       | 70458-96-7 |
|                |                       | Ofloxacin         | 82419-36-1 |
|                |                       | Ciprofloxacin     | 85721-33-1 |
|                |                       | Tetracycline      | 60-54-8    |
|                | Tetracycline          | Oxytetracycline   | 79-57-2    |
|                |                       | Chlortetracycline | 57-62-5    |
|                |                       | Roxithromycin     | 80214-83-1 |
|                | Macrolide             | Erythromycin      | 114-07-8   |
|                |                       | Clarithromycin    | 81103-11-9 |
|                |                       | Lincomycin        | 154-21-2   |
|                |                       | Trimethoprim      | 738-70-5   |
| Non-antibiotic | Anti-inflammatory     | Diclofenac        | 15307-86-5 |
|                |                       | Indomethacin      | 53-86-1    |
|                |                       | Ibuprofen         | 15687-27-1 |
|                |                       | Mefenamic acid    | 61-68-7    |
|                |                       | Naproxen          | 22204-53-1 |
|                | Blood lipid regulator | Bezafibrate       | 41859-67-0 |
|                |                       | Gemfibrozil       | 25812-30-0 |
|                | Anticonvulsant        | Carbamazepine     | 298-46-4   |
|                | Disinfectant          | Triclosan         | 3380-34-5  |

**Table S2**

Determination and quality control information for PPCPs. Q, quantification transition of different cone and collision voltages; LOD, limit of detection.

| Name             | ESI mode | Q1      | Q2      | Retention time (min) | Spiked recoveries (%) | LOD (ng/L) |
|------------------|----------|---------|---------|----------------------|-----------------------|------------|
| Sulfadiazine     | Positive | 251>156 | 251>108 | 1.11                 | 113                   | 0.20       |
| Sulfamethazine   | Positive | 279>186 | 279>156 | 3.70                 | 114                   | 0.50       |
| Norfloxacin      | Positive | 320>302 | 320>276 | 3.47                 | 96.0                  | 10.0       |
| Ofloxacin        | Positive | 362>318 | 362>261 | 5.10                 | 80.0                  | 10.0       |
| Roxithromycin    | Positive | 838>680 | 838>158 | 9.29                 | 64.2                  | 5.00       |
| Sulfamethoxazole | Positive | 254>92  | 254>156 | 1.88                 | 109                   | 0.20       |
| Ciprofloxacin    | Positive | 332>288 | 332>231 | 3.76                 | 88.4                  | 10.0       |
| Trimethoprim     | Positive | 291>230 | 291>123 | 5.43                 | 120                   | 0.20       |
| Diclofenac       | Positive | 296>250 | 296>214 | 7.51                 | 85.0                  | 5.00       |
| Indomethacin     | Positive | 358>139 | 358>111 | 7.77                 | 112                   | 1.00       |
| Carbamazepine    | Positive | 237>194 | 237>179 | 6.99                 | 113                   | 0.20       |
| Ibuprofen        | Negative | 224>207 | 224>161 | 7.41                 | 101                   | 5.00       |
| Bezafibrate      | Positive | 362>316 | 362>139 | 6.90                 | 113                   | 0.20       |
| Lincomycin       | Positive | 407>359 | 407>126 | 7.35                 | 112                   | 0.20       |
| Erythromycin     | Positive | 716>558 | 716>158 | 8.90                 | 95.1                  | 0.20       |
| Clarithromycin   | Positive | 749>591 | 749>158 | 9.09                 | 114                   | 0.20       |

| <div> <b>Table S3</b><br/>           Toxicity data of PPCPs         </div> |             |                           |                      |      |                      |               |             |                           |                      |      |             |
|----------------------------------------------------------------------------|-------------|---------------------------|----------------------|------|----------------------|---------------|-------------|---------------------------|----------------------|------|-------------|
| PPCPs                                                                      | Population  | Species                   | Toxicity data (mg/L) | AF   | PNEC (mg/L)          | PPCPs         | Population  | Species                   | Toxicity data (mg/L) | AF   | PNEC (mg/L) |
| Sulfadiazine                                                               | Algae       | Selenastrum capricornutum | NOEC = 1             | 10   | 0.1                  | Diclofenac    | Algae       | Algae                     | NOEC = 0.1           | 10   | 0.01        |
|                                                                            | Crustaceans | Daphnia magna             | LOEC = 150           | 10   | 15                   |               | Crustaceans | Daphnia magna             | NOEC = 0.00036       | 10   | 0.000036    |
|                                                                            | Fish        | -                         | LC50 = 907           | 1000 | 0.907 <sup>a</sup>   |               | Fish        | Oncorhynchus mykiss       | NOEC = 0.00106       | 10   | 0.000106    |
| Sulfamethazine                                                             | Algae       | Raphidocelis subcapitata  | NOEC = 1             | 10   | 0.1                  | Indomethacin  | Algae       | Raphidocelis subcapitata  | EC50 = 20            | 1000 | 0.02        |
|                                                                            | Crustaceans | Daphnia magna             | NOEC = 1.563         | 10   | 0.1563               |               | Crustaceans | Thamnocephalus platyurus  | LC50 = 16.14         | 1000 | 0.01614     |
|                                                                            | Fish        | Oryzias latipes           | NOEC = 10            | 10   | 1                    |               | Fish        | Danio rerio               | NOEC = 0.001         | 10   | 0.0001      |
| Norfloxacin                                                                | Algae       | Microcystis aeruginosa    | NOEC = 0.0016        | 10   | 0.00016              | Carbamazepine | Algae       | Chaetophora sp.           | NOEC = 0.002         | 10   | 0.0002      |
|                                                                            | Crustaceans | Daphnia magna             | NOEC = 0.12          | 10   | 0.012                |               | Crustaceans | Daphnia magna             | NOEC = 0.0005        | 10   | 0.00005     |
|                                                                            | Fish        | Carassius auratus         | NOEC = 0.0027        | 10   | 0.00027              |               | Fish        | Danio rerio               | NOEC = 0.01          | 10   | 0.001       |
| Ofloxacin                                                                  | Algae       | -                         | EC50 = 2440          | 1000 | 2.44 <sup>a</sup>    | Ibuprofen     | Algae       | Selenastrum capricornutum | NOEC = 0.01          | 10   | 0.001       |
|                                                                            | Crustaceans | Daphnia magna             | NOEC = 10            | 10   | 1                    |               | Crustaceans | Daphnia magna             | NOEC = 1.23          | 10   | 0.123       |
|                                                                            | Fish        | Pimephales promelas       | NOEC = 10            | 10   | 1                    |               | Fish        | Danio rerio               | NOEC = 0.0000664     | 10   | 0.00000664  |
| Roxithromycin                                                              | Algae       | Raphidocelis subcapitata  | NOEC = 0.01          | 10   | 0.001                | Bezafibrate   | Algae       | Anabaena sp.              | EC50 = 7.62          | 1000 | 0.00762     |
|                                                                            | Crustaceans | -                         | LC50 = 6.72          | 1000 | 0.00672 <sup>a</sup> |               | Crustaceans | Ceriodaphnia dubia        | NOEC = 0.023         | 10   | 0.0023      |
|                                                                            | Fish        | -                         | LC50 = 51.6          | 1000 | 0.0516 <sup>a</sup>  |               | Fish        | Danio rerio               | NOEC = 0.00003386    | 10   | 0.000003386 |
| Sulfamethoxazole                                                           | Algae       | Raphidocelis subcapitata  | NOEC = 0.5           | 10   | 0.05                 | Lincomycin    | Algae       | Raphidocelis subcapitata  | EC50 = 0.07          | 1000 | 0.00007     |
|                                                                            | Crustaceans | Daphnia magna             | NOEC = 1.11          | 10   | 0.111                |               | Crustaceans | Ceriodaphnia              | EC50 = 7.2           | 1000 | 0.0072      |

|               |             |                           |              |      |                   |                |             |                            |              |      |         |
|---------------|-------------|---------------------------|--------------|------|-------------------|----------------|-------------|----------------------------|--------------|------|---------|
| Ciprofloxacin | Fish        | Oryzias latipes           | NOEC = 0.5   | 10   | 0.05              | Erythromycin   | Fish        | Danio rerio                | NOEC = 1000  | 10   | 100     |
|               | Algae       | Selenastrum capricornutum | NOEC = 0.5   | 10   | 0.05              |                | Algae       | Synechococcus leopoliensis | NOEC = 0.002 | 10   | 0.0002  |
|               | Crustaceans | Daphnia magna             | EC50 = 1     | 1000 | 0.001             |                | Crustaceans | Daphnia magna              | NOEC = 11.1  | 10   | 1.11    |
|               | Fish        | -                         | LC50 = 13100 | 1000 | 13.1 <sup>a</sup> |                | Fish        | Oryzias latipes            | NOEC = 100   | 10   | 10      |
|               | Algae       | Anabaena variabilis       | NOEC = 3.1   | 10   | 0.31              |                | Algae       | Raphidocelis subcapitata   | NOEC = 0.04  | 10   | 0.004   |
| Trimethoprim  | Crustaceans | Daphnia magna             | NOEC = 3.12  | 10   | 0.312             | Clarithromycin | Crustaceans | Ceriodaphnia dubia         | EC50 = 8.16  | 1000 | 0.00816 |
|               | Fish        | Danio rerio               | NOEC = 0.157 | 10   | 0.0157            |                | Fish        | Danio rerio                | NOEC = 1000  | 10   | 100     |

<sup>a</sup> The PNEC of PPCPs estimated by ECOSAR (V2.0) if no toxicity data was available.

**Table S4**

Occurrence of PPCPs in surface water of the Daqing River Basin

| Name             | Mean of the rank sums | Freq. (%) |
|------------------|-----------------------|-----------|
| Sulfadiazine     | 136                   | 83.3      |
| Sulfamethazine   | 112                   | 66.7      |
| Norfloxacin      | 203                   | 58.3      |
| Ofloxacin        | 278                   | 91.7      |
| Roxithromycin    | 188                   | 58.3      |
| Sulfamethoxazole | 240                   | 100       |
| Ciprofloxacin    | 76.3                  | 8.33      |
| Trimethoprim     | 156                   | 75        |
| Diclofenac       | 192                   | 58.3      |
| Indomethacin     | 126                   | 45.8      |
| Carbamazepine    | 238                   | 100       |
| Ibuprofen        | 87.9                  | 12.5      |
| Bezafibrate      | 132                   | 75        |
| Lincomycin       | 226                   | 100       |
| Erythromycin     | 277                   | 100       |
| Clarithromycin   | 154                   | 58.3      |

| <div> <b>Table S5</b><br/>           Comparison of median concentrations (ng L<sup>-1</sup>) of 16 detectable PPCPs in this study with others         </div> |              |              |                |                  |                  |               |                                    |                  |                                  |                                                  |
|--------------------------------------------------------------------------------------------------------------------------------------------------------------|--------------|--------------|----------------|------------------|------------------|---------------|------------------------------------|------------------|----------------------------------|--------------------------------------------------|
| Location                                                                                                                                                     | Country      | Sulfadiazine | Sulfamethazine | Norfloxacin      | Ofloxacin        | Roxithromycin | Sulfamethoxazole                   | Ciprofloxacin    | Trimethoprim                     | References                                       |
| Daqing River Basin                                                                                                                                           | China        | 0.4          | 0.5            | 21.6             | 22               | 10.5          | 10.4                               | ND               | 2                                | This study                                       |
| Yangtze River Delta                                                                                                                                          | China        | ND -1.31     | 0.86-2.65      | 19               | ND-19            | ND-8.1        | 7-30                               | 9.5              | ND-1.38                          | [1–5]                                            |
| Songhua River                                                                                                                                                | China        | —            | —              | —                | ND               | —             | 2.5-4.5                            | ND               | —                                | [6]                                              |
| Beiyun River                                                                                                                                                 | China        | 50           | 20             | —                | —                | —             | 100                                | —                | 302                              | [7,8]                                            |
| Zhujiang River                                                                                                                                               | China        | —            | —              | —                | —                | —             | —                                  | —                | —                                | [9]                                              |
| Liao River                                                                                                                                                   | China        | —            | —              | ND               | ND               | 6.75          | 59.8                               | ND               | —                                | [10]                                             |
| Jinsha River                                                                                                                                                 | China        | ND           | —              | ND               | ND               | 0.68          | 0.97                               | ND               | —                                | [11]                                             |
| Riyadh surface water                                                                                                                                         | Saudi Arabia | —            | —              | 537 <sup>a</sup> | 393 <sup>a</sup> | —             | —                                  | —                | —                                | [12]                                             |
| Yamuna river                                                                                                                                                 | India        | —            | —              | —                | —                | —             | 184 <sup>a</sup>                   | 115 <sup>a</sup> | 2188 <sup>a</sup>                | (Mutiyar et al. 2018; Biswas and Vellanki. 2021) |
| Wadi Shueib                                                                                                                                                  | Jordan       | —            | —              | —                | —                | —             | —                                  | —                | —                                |                                                  |
| Apatlaco River                                                                                                                                               | Mexico       | —            | —              | —                | —                | —             | 173 <sup>a</sup> -642 <sup>a</sup> | —                | 37 <sup>a</sup> -72 <sup>a</sup> | [16]                                             |
| Iberian rivers                                                                                                                                               | Spain        | —            | —              | —                | 0.07-0.98        | —             | 0.16-0.44                          | 0.1-0.78         | 0.17-6.17                        | [17]                                             |
| Surface water of Saitama,<br>Kyoto, Tokushima                                                                                                                | Japan        | —            | —              | ND               | —                | 12.5          | 30.3                               | ND               | ND                               | [18]                                             |

| Location                                      | Country      | Diclofenac                           | Indomethacin                      | Carbamazepine                      | Ibuprofen                          | Bezafibrate                         | Lincomycin | Erythromycin | Clarithromycin | References |
|-----------------------------------------------|--------------|--------------------------------------|-----------------------------------|------------------------------------|------------------------------------|-------------------------------------|------------|--------------|----------------|------------|
| Daqing River Basin                            | China        | 7.8                                  | ND                                | 11.8                               | ND                                 | 0.8                                 | 8.6        | 24.3         | 3              | This study |
| Yangtze River Delta                           | China        | 4.4                                  | —                                 | 0.3-8.22                           | 22                                 | —                                   | ND-10.6    | ND-7.3       | ND             | [1–5]      |
| Songhua River                                 | China        | 0.8-3                                | —                                 | —                                  | 2.6                                | —                                   | 4-6.8      | 1.5-3.6      | —              | [6]        |
| Beiyun River                                  | China        | 810                                  | 58.6                              | 93.1                               | —                                  | 10-83.9                             | —          | 715          | 10             | [7,8]      |
| Zhujiang River                                | China        | 25.2                                 | 2.61                              | —                                  | 58.2                               | —                                   | —          | —            | —              | [9]        |
| Liao River                                    | China        | —                                    | —                                 | —                                  | —                                  | —                                   | —          | —            | —              | [10]       |
| Jinsha River                                  | China        | ND                                   | —                                 | —                                  | ND                                 | —                                   | 0.42       | ND           | 0.57           | [11]       |
| Riyadh surface water                          | Saudi Arabia | 1188 <sup>a</sup>                    | 0.08 <sup>a</sup>                 | —                                  | 976 <sup>a</sup>                   | —                                   | —          | —            | —              | [12]       |
| Yamuna river                                  | India        | 18.5 <sup>a</sup> -96.1 <sup>a</sup> | —                                 | 119 <sup>a</sup> -412 <sup>a</sup> | 662 <sup>a</sup>                   | —                                   | —          | —            | —              | [13,14]    |
| Wadi Shueib                                   | Jordan       | 35                                   | —                                 | 240                                | 250                                | 26                                  | —          | —            | —              | [15]       |
| Apatlaco River                                | Mexico       | 283 <sup>a</sup> -1209 <sup>a</sup>  | 20 <sup>a</sup> -212 <sup>a</sup> | 19 <sup>a</sup> -90 <sup>a</sup>   | 231 <sup>a</sup> -836 <sup>a</sup> | 362 <sup>a</sup> -1513 <sup>a</sup> | —          | —            | —              | [16]       |
| Iberian rivers                                | Spain        | 1.02-11.3                            | 0.16-4.83                         | 0.02-8.88                          | 1.94-34.1                          | 0.03-3.02                           | —          | 0.22         | 0.09-0.25      | [17]       |
| Surface water of Saitama,<br>Kyoto, Tokushima | Japan        | 22.1                                 | 30.3                              | 12.7                               | ND                                 | 138                                 | ND         | 14.9         | 210            | [18]       |

<sup>a</sup> The average concentrations of PPCPs if no median concentration was available. ND, not detected.



|      |      |      |      |      |      |      |     |      |      |      |
|------|------|------|------|------|------|------|-----|------|------|------|
| 8    | 21.6 | 1.5  | ND   | ND   | 14.4 | ND   | ND  | 2.7  | 10.9 | 2.8  |
| 34.4 | ND   | 19.5 | 203  | 17.8 | 20.3 | 26   | 11  | 45.4 | 148  | 33.3 |
| 30.9 | ND   | 7.6  | 52.9 | 8    | 25.4 | 40.5 | 6.9 | 23.2 | 102  | 23   |
| 12.2 | ND   | 3.2  | ND   | ND   | 10.6 | ND   | 1   | 2.9  | 27.7 | ND   |
| 96.9 | ND   | 7.9  | 81.5 | 2.9  | 21.1 | ND   | 4.4 | 6.3  | 110  | 14.7 |
| 72.1 | ND   | 6.9  | 9.9  | 3    | 14.5 | ND   | 1.9 | 4.4  | 67.9 | 18.9 |
| 2.2  | ND   | ND   | ND   | ND   | 0.7  | ND   | ND  | 1.2  | 2.5  | ND   |
| 19.9 | ND   | 3.3  | 34.9 | 4    | 29.3 | ND   | ND  | 11.9 | 14.1 | 3.4  |
| 2.3  | ND   | ND   | ND   | ND   | 1.9  | ND   | 0.6 | 4    | 3.8  | ND   |
| 10.4 | ND   | 2.3  | 45.4 | 3.7  | 50   | ND   | 1.1 | 6.5  | 80.9 | 10.6 |
| 15.8 | 16.6 | 3.8  | 75.2 | 5.8  | 64   | ND   | 1.2 | 5.2  | 89.4 | 13.8 |
| 2.4  | ND   | 1.6  | 5    | ND   | 1.8  | ND   | 0.4 | 17.5 | 10.8 | ND   |
| 15.2 | ND   | 3.1  | 27.9 | 3    | 81.4 | ND   | 1.7 | 9.7  | 73.6 | 8.8  |
| 18.8 | ND   | 3.1  | 23.7 | 5    | 227  | ND   | 0.7 | 12.6 | 52.5 | 9    |
| 8.7  | ND   | 1.1  | 9.1  | 1.3  | 2.7  | ND   | ND  | 6.2  | 5.7  | ND   |
| 7.3  | ND   | ND   | 14.6 | 1.4  | 3.5  | ND   | ND  | 7.4  | 9.2  | ND   |
| 10.5 | ND   | 2.9  | 9.5  | ND   | 5.5  | ND   | 1.8 | 22.7 | 33.4 | 4.1  |
| 5.8  | ND   | 1.6  | ND   | ND   | 13   | ND   | 1.2 | 11.7 | 20.9 | ND   |
| 10.3 | ND   | 2.9  | ND   | ND   | 2.7  | ND   | 5.8 | 30.5 | 70.3 | 3.3  |
| 6.3  | ND   | ND   | ND   | ND   | 3.3  | ND   | 0.6 | 1.9  | 6.1  | ND   |
| 2.6  | ND   | 1.2  | ND   | ND   | 2.7  | 12.5 | 0.3 | 0.8  | 8.8  | ND   |
| 3.1  | ND   | ND   | ND   | ND   | 3.6  | ND   | ND  | 13.5 | 5.7  | ND   |
| 10.7 | ND   | 1    | ND   | ND   | 16.8 | ND   | 0.6 | 12.1 | 50.4 | 5.4  |
| 4.9  | ND   | ND   | 6.4  | ND   | 9.5  | ND   | 1.4 | 23.3 | 16.6 | 2.4  |

**Table S7**

Concentrations (mg/L) of conventional water pollutants at different sampling site

| Sampling site | COD | BOD <sub>5</sub> | TP   | TN   | NH <sub>4</sub> -N |
|---------------|-----|------------------|------|------|--------------------|
| JB1           | 17  | 1.1              | 0.06 | 2.94 | 0.22               |
| JW1           | 21  | 7.6              | 0.21 | 5.06 | 1.58               |
| JE1           | 25  | 7.6              | 0.23 | 5.07 | 2.42               |
| JB2           | 9   | 1.9              | 0.05 | 3.24 | 0.13               |
| JE2           | 13  | 1.7              | 0.05 | 4.75 | 0.22               |
| JE3           | 9   | 1.3              | 0.06 | 4.78 | 0.14               |
| FB1           | 7   | 1.9              | 0.02 | 2.76 | 0.08               |
| FW1           | 7   | 1.5              | 0.03 | 2.8  | 0.34               |
| FE1           | 7   | 1.9              | 0.04 | 2.33 | 0.23               |
| FE2           | 14  | 3.7              | 0.09 | 3.71 | 0.45               |
| FW2           | 23  | 3                | 0.11 | 4.26 | 0.28               |
| FW3           | 9   | 2.3              | 0.06 | 2.36 | 0.23               |
| FE3           | 16  | 1.7              | 0.08 | 4.04 | 0.27               |
| FE4           | 15  | 1.6              | 0.06 | 3.33 | 0.19               |
| XB1           | 6   | 1.2              | 0.02 | 3.3  | 0.05               |
| XB2           | 6   | 1.4              | 0.03 | 3.13 | 0.02               |
| XW1           | 14  | 2.1              | 0.07 | 3.43 | 0.26               |
| XE1           | 21  | 2.8              | 0.1  | 2.94 | 0.3                |
| XW2           | 29  | 4.1              | 0.16 | 2.8  | 0.59               |
| XE2           | 11  | 1.8              | 0.08 | 3.38 | 0.22               |
| XW3           | 21  | 2.9              | 0.08 | 3.12 | 0.28               |
| XE3           | 21  | 2.6              | 0.14 | 1.47 | 0.19               |
| BL            | 18  | 1.9              | 0.05 | 1.26 | 0.23               |
| DR            | 21  | 2.3              | 0.06 | 1.34 | 0.44               |

## References

1. Xie, Z.; Lu, G.; Yan, Z.-H.; Liu, J.; Wang, P.; Wang, Y. Bioaccumulation and Trophic Transfer of Pharmaceuticals in Food Webs from a Large Freshwater Lake. *Environ. Pollut.* **1987** **2016**, 222.
2. Zhou, L.-J.; Wu, Q.; Zhang, B.-B.; Zhao, Y.; Zhao, B.-Y. Occurrence, Spatiotemporal Distribution, Mass Balance and Ecological Risks of Antibiotics in the Subtropical Shallow Lake Taihu, China. *Environ. Sci. Process. Impacts* **2016**, 18.
3. Peng, Y.; Fang, W.; Krauss, M.; Brack, W.; Wang, Z.; Li, F.; Zhang, X. Screening Hundreds of Emerging Organic Pollutants (EOPs) in Surface Water from the Yangtze River Delta (YRD): Occurrence, Distribution, Ecological Risk. *Environ. Pollut.* **1987** **2018**, 241, 484–493.
4. Li, L.; Zhao, X.; Liu, D.; Song, K.; Liu, Q.; He, Y. Occurrence and Ecological Risk Assessment of PPCPs in Typical Inflow Rivers of Taihu Lake, China. *J. Environ. Manage.* **2021**, 285, 112176.
5. Yang, Y.; Chen, Z.; Zhang, J.; Wu, S.; Yang, L.; Chen, L.; Shao, Y. The Challenge of Micropollutants in Surface Water of the Yangtze River. *Sci. Total Environ.* **2021**, 780, 146537.
6. He, S.; Dong, D.; Zhang, X.; Sun, C.; Chaoqian, W.; Hua, X.; Zhang, L.; Guo, Z. Occurrence and Ecological Risk Assessment of 22 Emerging Contaminants in the Jilin Songhua River (Northeast China). *Environ. Sci. Pollut. Res.* **2018**, 25.
7. Ma, R.; Wang, B.; Yin, L.; Zhang, Y.; Deng, S.; Huang, J.; Wang, Y.; Yu, G. Characterization of Pharmaceutically Active Compounds in Beijing, China: Occurrence Pattern, Spatiotemporal Distribution and Its Environmental Implication. *J. Hazard. Mater.* **2016**, 323.
8. Yang, L.; He, J.T.; Sihui, S.; Cui, Y.-F.; Huang, D.-L.; Wang, G. Occurrence, Distribution, and Attenuation of Pharmaceuticals and Personal Care Products in the Riverside Groundwater of the Beiyun River of Beijing, China. *Environ. Sci. Pollut. Res.* **2017**, 24.
9. Peng, F.-J.; Pan, C.-G.; Zhang, M.; Zhang, N.-S.; Windfeld, R.; Salvito, D.; Selck, H.; Van den Brink, P.; Ying, G.-G. Occurrence and Ecological Risk Assessment of Emerging Organic Chemicals in Urban Rivers: Guangzhou as a Case Study in China. *Sci. Total Environ.* **2017**, 589, 46–55.
10. Bai, Y.; Meng, W.; Xu, J.; Zhang, Y. Occurrence, Distribution and Bioaccumulation of Antibiotics in the Liao River Basin in China. *Environ. Sci. Process. Impacts* **2014**, 16.
11. Liu, S.; Wang, C.; Wang, P.; Chen, J.; Wang, X.; Yuan, Q. Anthropogenic Disturbances on Distribution and Sources of Pharmaceuticals and Personal Care Products throughout the Jinsha River Basin, China. *Environ. Res.* **2020**, 110449.
12. Pico, Y.; Campo, J.; Alfarhan, A.; El-Sheikh, M.; Barcelo, D. A Reconnaissance Study of Pharmaceuticals, Pesticides, Perfluoroalkyl Substances and Organophosphorus Flame Retardants in the Aquatic Environment, Wild Plants and Vegetables of Two Saudi Arabia Urban Areas: Environmental and Human Health Risk Assessment. *Sci. Total Environ.* **2021**, 776, 145843.

13. MUTIYAR, P.; Gupta, S.; Mittal, A. Fate of Pharmaceutical Active Compounds (PhACs) from River Yamuna, India: An Ecotoxicological Risk Assessment Approach. *Ecotoxicol. Environ. Saf.* **2018**, *150*, 297–304.
14. Biswas, P.; Vellanki, B. Occurrence of Emerging Contaminants in Highly Anthropogenically Influenced River Yamuna in India. *Sci. Total Environ.* **2021**, *782*, 146741.
15. Zemmann, M.; Wolf, L.; Grimmeisen, F.; Tiehm, A.; Klinger, J.; Hötzel, H.; Goldscheider, N. Tracking Changing X-Ray Contrast Media Application to an Urban-Influenced Karst Aquifer in the Wadi Shueib, Jordan. *Environ. Pollut.* **2015**, *198*.
16. Rivera, J.; Postigo, C.; Rosa María, M.-A.; Aceña, J.; Barcelo, D.; Lopez de Alda, M. Study of Pharmaceuticals in Surface and Wastewater from Cuernavaca, Morelos, Mexico: Occurrence and Environmental Risk Assessment. *Sci. Total Environ.* **2017**, *613–614*, 1263–1274.
17. Osorio, V.; Larrañaga, A.; Aceña, J.; Pérez, S.; Barcelo, D. Concentration and Risk of Pharmaceuticals in Freshwater Systems Are Related to the Population Density and the Livestock Units in Iberian Rivers. *Sci. Total Environ.* **2015**, *7*.
18. Tamura, I.; Yasuda, Y.; Kagota, K.; Yoneda, S.; Nakada, N.; Kumar, V.; Kameda, Y.; Kimura, K.; Tatarazako, N.; Yamamoto, H. Contribution of Pharmaceuticals and Personal Care Products (PPCPs) to Whole Toxicity of Water Samples Collected in Effluent-Dominated Urban Streams. *Ecotoxicol. Environ. Saf.* **2017**, *144*, 338–350.
